# Supplementary material for: Biocatalytic Transformation of 5-Hydroxymethylfurfural into 2,5-Di(hydroxymethyl)furan by a Newly Isolated Fusarium striatum Strain
Source: Preprints.org preprint supplement (doi:10.20944/preprints202101.0414.v1), 2021-01-21
Supplement: Supplementary file 1 [file supplementary]

Archive with 1 entries (1 files):
- Supplementary materials.pdf
